## The ASCC2 CUE domain contacts adjacent ubiquitins to recognize K63-linked polyubiquitin

Patrick M. Lombardi<sup>1,2,\*</sup>, Sara Haile<sup>1</sup>, Timur Rusanov<sup>4</sup>, Rebecca Rodell<sup>4</sup>, Rita Anoh<sup>2</sup>, Julia G. Baer<sup>2</sup>, Kate A. Burke<sup>2</sup>, Lauren N. Gray<sup>2</sup>, Abigail R. Hacker<sup>2</sup>, Kayla R. Kebreau<sup>2</sup>, Christine K. Ngandu<sup>2</sup>, Hannah A. Orland<sup>2</sup>, Emmanuella Osei-Asante<sup>2</sup>, Dhane P. Schmelyun<sup>2</sup>, Devin E. Shorb<sup>2</sup>, Shaheer H. Syed<sup>2</sup>, Julianna M. Veilleux<sup>2</sup>, Ananya Majumdar<sup>3</sup>, Nima Mosammamparast<sup>4</sup>, Cynthia Wolberger<sup>1,\*</sup>

<sup>1</sup>Department of Biophysics and Biophysical Chemistry, The Johns Hopkins University School of Medicine, Baltimore, MD 21205

<sup>2</sup>Department of Science, Mount St. Mary's University, Emmitsburg, MD 21727

<sup>3</sup>Biomolecular NMR Center, The Johns Hopkins University, Baltimore, MD 21218

<sup>4</sup>Department of Pathology and Immunology, Washington University School of Medicine, St. Louis, MO 63110

\*Co-corresponding authors:

Patrick M. Lombardi [p.m.lombardi@msmary.edu](mailto:p.m.lombardi@msmary.edu)

Cynthia Wolberger [cwolberg@jhmi.edu](mailto:cwolberg@jhmi.edu)

Running title: The ASCC2 CUE domain binds two adjacent ubiquitins

Keywords: polyubiquitin, ubiquitin, ubiquitin-binding domain, DNA damage response, alkylation damage, signaling, isothermal titration calorimetry (ITC), nuclear magnetic resonance (NMR), site-directed mutagenesis, immunofluorescence microscopy

## Abstract

Alkylation of DNA and RNA is a potentially toxic lesion that can result in mutations and cell death. In response to alkylation damage, K63-linked polyubiquitin chains are assembled that localize the ALKBH3-ASCC repair complex to damage sites in the nucleus. The protein ASCC2, a subunit of the ASCC complex, selectively binds K63-linked polyubiquitin chains using its CUE domain, a type of ubiquitin-binding domain that typically binds monoubiquitin and does not discriminate among different polyubiquitin linkage types. We report here that the ASCC2 CUE domain selectively binds K63-linked diubiquitin by contacting both the distal and proximal ubiquitin. Whereas the ASCC2 CUE domain binds the distal ubiquitin in a manner similar to that reported for other CUE domains bound to a single ubiquitin, the contacts with the proximal ubiquitin are unique to ASCC2. The N-terminal portion of the ASCC2  $\alpha$ 1 helix, including residues E467 and S470, contributes to the binding interaction with the proximal ubiquitin of K63-linked diubiquitin. Mutation of residues within the N-terminal portion of the ASCC2  $\alpha$ 1 helix decreases ASCC2 recruitment in response to DNA alkylation, supporting the functional significance of these interactions during the alkylation damage response.

## 1 Introduction

2 Ubiquitylation is a reversible, post-translational modification that regulates a vast array  
3 of cellular processes including proteasomal degradation, transcription, and the DNA  
4 damage response (1-3). The ubiquitin C-terminus is conjugated to protein substrates in  
5 a cascade of enzymatic reactions, most commonly forming a covalent linkage with the  
6  $\epsilon$ -amino group of a lysine side chain or the N-terminal  $\alpha$ -amine (4). Ubiquitin itself can  
7 be ubiquitinated via one of its seven lysine residues or at its amino terminus, giving rise  
8 to homotypic or branched polyubiquitin chains with distinct topologies and biological  
9 functions (5). Different types of polyubiquitin chains are recognized by domains or  
10 motifs that bind specifically to the particular ubiquitin modification, thereby recruiting  
11 downstream effector proteins (6). In this manner, the diversity of ubiquitin signaling is  
12 predicated on the ability of ubiquitin-binding proteins to differentiate among the myriad  
13 types of polyubiquitin modifications present in the cell.

14  
15 Lysine 63 (K63)-linked polyubiquitin chains play a non-degradative role in several DNA  
16 damage response pathways, including the response to DNA alkylation (2,7). The E3  
17 ubiquitin ligase, RNF113A, assembles K63-linked polyubiquitin chains at sites of  
18 alkylation damage (7). These polyubiquitin chains recruit the ALKBH3-ASCC complex,  
19 which repairs the lesions (7). A subunit of the complex, ASCC2, binds to the K63-linked  
20 polyubiquitin chains via its CUE domain, a ubiquitin-binding domain of approximately 50  
21 amino acids (Figure 1) (8,9). As shown for Cue1, Cue2, gp78, and Vps9, CUE domains  
22 bind the hydrophobic I44 patch of ubiquitin via conserved hydrophobic sequence motifs  
23 (Figure 1B) (8-11). These sequence motifs are conserved in ASCC2, suggesting that its

24 CUE domain binds ubiquitin in a similar manner. Indeed, substitution of ASCC2 residue  
25 L506, which lies in the predicted ubiquitin-binding patch, abrogates ubiquitin binding *in*  
26 *vitro* and dramatically reduces formation of ASCC2 nuclear foci in response to alkylation  
27 damage (7). CUE domains typically make extensive interactions with a single ubiquitin  
28 within a polyubiquitin chain and exhibit little selectivity among different types of  
29 polyubiquitin chains (8-10,12). It is not known what other ASCC2 surfaces mediate  
30 interactions with ubiquitin and specify binding for K63-linked polyubiquitin.

31  
32 We report here that the ASCC2 CUE domain binds with higher affinity to K63-linked  
33 polyubiquitin as compared to monoubiquitin or other types of polyubiquitin chains. Using  
34 solution nuclear magnetic resonance (NMR), we show that a single ASCC2 CUE  
35 domain makes distinct contacts with the two adjacent ubiquitins within a single K63-  
36 linked polyubiquitin chain. In addition to mediating conserved interactions with the I44  
37 patch of the distal ubiquitin, a separate region of the ASCC2 CUE domain forms  
38 additional interactions with the proximal ubiquitin in K63-linked polyubiquitin. Mutations  
39 in the ASCC2 CUE domain residues that contact the proximal ubiquitin disrupt  
40 recruitment of ASCC2 to repair foci, consistent with the importance of these residues in  
41 binding to K63-linked polyubiquitin. Together, our data show that the ASCC2 CUE  
42 domain makes multiple, linkage-specific interactions with adjacent ubiquitins to enhance  
43 the affinity of the ALKBH3-ASCC complex for K63-linked polyubiquitin chains at  
44 alkylation damage sites.

45

46

## 47 **Results**

48

### 49 **The ASCC2 CUE domain has enhanced affinity and specificity for K63-linked** 50 **polyubiquitin chains**

51 The ASCC2 CUE domain comprises a three-helix bundle that spans residues 465-521  
52 (Figure 1). The solution structure of the ASCC2 CUE domain has been deposited in the  
53 Protein Data Bank (PDB ID: 2DI0) (Figure 1B) and is similar to other experimentally  
54 determined CUE domain structures. The structure of the ASCC2 CUE domain  
55 superimposes with the Cue2 CUE domain (PDB ID: 1OTR) (8) with an RMSD of 0.92 Å  
56 over 37 alpha carbons and with the gp78 CUE domain (PDB ID: 2LVN) (10) with an  
57 RMSD of 1.34 Å over 41 alpha carbons. Like other CUE domains, ASCC2 has a cluster  
58 of hydrophobic residues on helix 1 and on helix 3, which are predicted to bind to the I44  
59 patch of ubiquitin as in previously characterized CUE:ubiquitin interactions (8-12)  
60 (Figure 1B). The previous finding that a substitution at L506 in helix 3 leads to defects in  
61 ASCC2 recruitment in cells (7) is consistent with a role for this surface in ASCC2  
62 binding to ubiquitin.

63

64 In order to determine whether the ASCC2 CUE domain binds in a similar manner to  
65 ubiquitin irrespective of whether it is incorporated into a polyubiquitin chain, we used  
66 isothermal titration calorimetry (ITC) to compare binding of ASCC2 CUE domain  
67 constructs to monoubiquitin and to K63-linked diubiquitin (K63Ub<sub>2</sub>). As shown in Figures  
68 2A and 2B, we found that the ASCC2 CUE domain binds with lower affinity to  
69 monoubiquitin than to K63Ub<sub>2</sub>. The equilibrium dissociation constant ( $K_d$ ) for

70 monoubiquitin was  $57.1 \mu\text{M} \pm 5.0 \mu\text{M}$  (Figure 2A), while ASCC2 bound much more  
71 tightly to K63Ub<sub>2</sub>, with a  $K_d$  of  $8.7 \mu\text{M} - 10.4 \mu\text{M}$  (Figure 2B). The affinity of the isolated  
72 ASCC2 CUE domain for K63Ub<sub>2</sub> is similar to that of full-length ASCC2, which binds to  
73 K63Ub<sub>2</sub> with a  $K_d$  of  $8.8 \mu\text{M} \pm 0.9 \mu\text{M}$  (Figure 2C). The similar equilibrium dissociation  
74 constants suggest that the majority of the affinity comes from the interaction between  
75 the CUE domain and K63Ub<sub>2</sub>. Importantly, the approximately 4 – 7-fold enhancement of  
76 ASCC2 CUE domain affinity for K63Ub<sub>2</sub> as compared to monoubiquitin is higher than  
77 the 1.0 – 1.8-fold enhancement in affinity that has been reported for other CUE domains  
78 binding to polyubiquitin versus monoubiquitin (10,11).

79  
80 Since very weak binding is difficult to measure accurately by ITC, we also estimated the  
81 affinity of the ASCC2 CUE domain for monoubiquitin using nuclear magnetic resonance  
82 (NMR) spectroscopy. The <sup>1</sup>H,<sup>15</sup>N-HSQC spectra of <sup>15</sup>N-labeled ASCC2(465-521) were  
83 recorded in the presence of increasing amounts of monoubiquitin and the chemical shift  
84 perturbations (CSPs) for four ASCC2 residues at the ubiquitin-binding interface were  
85 used to calculate the average  $K_d$  value (Supplementary Figure 1) (13). The  $K_d$  value of  
86  $39.6 \mu\text{M} \pm 1.6 \mu\text{M}$  determined by NMR suggests somewhat tighter monoubiquitin  
87 binding than the  $K_d$  determined by ITC ( $57.1 \mu\text{M} \pm 5.0 \mu\text{M}$  Figure 2A), although still  
88 substantially weaker than that measured for K63Ub<sub>2</sub> ( $K_d = 8.7 \mu\text{M} - 10.4 \mu\text{M}$  Figure 2B).

89  
90 The stoichiometry of the ASCC2 CUE domain binding K63-linked polyubiquitin chains is  
91 also different from that of previously studied CUE domains. CUE domains from other  
92 ubiquitin-binding proteins, such as gp78, bind diubiquitin with a ratio of two CUE

93 domains per diubiquitin (10), indicating that each CUE domain binds to one ubiquitin in  
94 the diubiquitin chain. The ASCC2 CUE domain, however, binds K63Ub<sub>2</sub> in a 1:1 ratio  
95 (Figure 2B), and this ratio is conserved in the binding of full-length ASCC2 to K63Ub<sub>2</sub>  
96 (Figures 2C). Importantly, the observed molar ratio of one ASCC2 CUE domain per  
97 K63Ub<sub>2</sub> is preserved in the context of longer polyubiquitin chains. As shown in Figure  
98 2D, the ASCC2 CUE domain binds to K63-linked tetraubiquitin with a molar ratio of 2:1,  
99 consistent with each CUE domain binding to two ubiquitins within the tetraubiquitin  
100 chain. Interestingly, the affinity of the ASCC2 CUE domain for K63-linked tetraubiquitin  
101 is about 4-fold higher than its affinity for diubiquitin (Figures 2B and 2D).

102

103 In order to test the specificity of ASCC2 for K63-linked diubiquitin as compared to other  
104 linkage types, we measured the  $K_d$  of the ASCC2 CUE domain for linear and K48-linked  
105 diubiquitin (K48Ub<sub>2</sub>). The affinity of the ASCC2 CUE domain for linear diubiquitin  
106 (M1Ub<sub>2</sub>) was extremely weak, with a  $K_d$  of about 400  $\mu$ M (Figure 2E). This result was  
107 surprising given that linear and K63-linked polyubiquitin adopt a similar extended  
108 topology (14,15). The affinity of the ASCC2 CUE domain for K48Ub<sub>2</sub> (Figure 2F), with a  
109  $K_d$  of about 98  $\mu$ M, was similar to that measured for monoubiquitin. These results  
110 indicate that the enhanced binding affinity of the ASCC2 CUE domain for polyubiquitin  
111 compared to monoubiquitin is specific to K63-linked chains.

112

113 **The ASCC2 CUE domain forms different contacts with the distal and proximal**  
114 **ubiquitin of K63Ub<sub>2</sub>**

115 The higher affinity of ASCC2 for di- or tetra-ubiquitin and the molar ratio of one ACSS2  
116 CUE domain per diubiquitin are consistent with a single CUE domain simultaneously  
117 contacting the linked proximal and distal ubiquitin. Given the small size and asymmetric  
118 fold of the CUE domain, ASCC2 would need to form different binding interfaces with the  
119 two ubiquitin monomers. We used NMR chemical shift mapping experiments to  
120 compare ASCC2 CUE domain contacts with the distal and proximal ubiquitins of  
121 K63Ub<sub>2</sub>. In order to distinguish the two covalently linked ubiquitin monomers, we  
122 generated diubiquitin with either the proximal or the distal ubiquitin isotopically labelled  
123 with <sup>15</sup>N. The <sup>1</sup>H,<sup>15</sup>N-HSQC spectra of the differently labeled K63Ub<sub>2</sub> were recorded in  
124 the presence of increasing concentrations of the ASCC2 CUE domain (Figure 3). The  
125 CSP values for the <sup>15</sup>N-labeled distal ubiquitin of K63Ub<sub>2</sub> titrated with the ASCC2 CUE  
126 domain (Figure 3A) are similar to those reported for other CUE domains interacting with  
127 monoubiquitin (10,11). Common features include relatively large CSP values for  
128 residues in and around the I44 patch, such as R42, I44, G47, and K48, and for residues  
129 70-74 at the C-terminal tail of ubiquitin (Figure 3A). The similar CSP values suggest the  
130 distal ubiquitin of K63Ub<sub>2</sub> binds the ASCC2 CUE domain using the same surface as  
131 previously reported CUE:ubiquitin interactions (10,11).

132

133 The CSP values for the <sup>15</sup>N-labeled proximal ubiquitin of K63Ub<sub>2</sub> titrated with  
134 ASCC2(465-521) (Figure 3B), however, were markedly different from those observed for  
135 the <sup>15</sup>N-labeled distal ubiquitin. The CSP values for ubiquitin residues V70, R72, L73,  
136 and R74 were smaller in the experiments with <sup>15</sup>N-labeled proximal ubiquitin (Figure 3B)  
137 as compared to the experiments with <sup>15</sup>N-labeled distal ubiquitin (Figure 3A). In addition,



138 large CSP values for residues E64 and T66 (Figures 3B) were unique to the proximal  
139 ubiquitin. The large CSP values for proximal ubiquitin residues E64 and T66 and the  
140 small CSP values for residues in the ubiquitin C-terminal tail suggest that the ASCC2  
141 CUE domain contacts the proximal ubiquitin in a non-canonical manner. The differences  
142 between the proximal and distal ubiquitin spectra suggest that the two ubiquitins form  
143 different interactions with the ASCC2 CUE domain.

144

145 To determine the contribution of proximal ubiquitin residues E64 and T66 to ASCC2  
146 CUE domain binding, we measured the affinity of the ASCC2 CUE domain for K63Ub<sub>2</sub>  
147 bearing side chains substitutions at proximal ubiquitin residues E64 and T66 (K63Ub<sub>2</sub>  
148 E64A/T66A<sub>prox</sub>) using ITC. As shown in Figure 4, the ASCC2 CUE domain binds  
149 K63Ub<sub>2</sub> E64A/T66A<sub>prox</sub> with a  $K_d$  in the range of 45.9  $\mu$ M – 90.9  $\mu$ M, approximately 3.5 –  
150 7.0 times more weakly than wild-type K63Ub<sub>2</sub>. This result supports the NMR data  
151 (Figure 3B) in suggesting that the ASCC2 CUE domain interacts with residues E64 and  
152 T66 of the proximal ubiquitin in K63Ub<sub>2</sub>.

153

154 **The N-terminal portion of the ASCC2  $\alpha$ 1 helix is important for K63-linked**

155 **polyubiquitin binding and recruitment to DNA damage foci**

156 To determine which ASCC2 residues interact with K63-linked polyubiquitin, the <sup>1</sup>H,<sup>15</sup>N-  
157 HSQC spectra of <sup>15</sup>N-labeled ASCC2 CUE domain were recorded in the presence of  
158 increasing concentrations of monoubiquitin and of K63Ub<sub>2</sub> (Figures 5). ASCC2 residues  
159 L479 and L506, from the conserved CUE domain hydrophobic sequence motifs in the  
160  $\alpha$ 1 and  $\alpha$ 3 helices, respectively, exhibited large CSP values when the ASCC2 CUE

161 domain was titrated with monoubiquitin or K63Ub<sub>2</sub> (Figures 5). This finding suggests  
162 that, as with other CUE domains (8-12), the hydrophobic surface created by the  
163 conserved sequence motifs is the binding site for monoubiquitin and one of the  
164 ubiquitins in K63Ub<sub>2</sub>. The distal ubiquitin of K63Ub<sub>2</sub> is most likely to bind the  
165 hydrophobic surface formed by the conserved sequence motifs given the similarities  
166 between its CSP values (Figure 3A) and those reported for monoubiquitin titrated with  
167 other CUE domains (10,11).

168  
169 The ASCC2 residues that interact with the proximal ubiquitin of K63-linked diubiquitin  
170 would be expected to have larger CSP values when the CUE domain is titrated with  
171 K63Ub<sub>2</sub> than when it is titrated with monoubiquitin. The  $\alpha$ 1 helix (residues 465-479;  
172 Figure 1A) is the only region of the ASCC2 CUE domain that has dramatically different  
173 CSP values in the presence of K63Ub<sub>2</sub> compared to monoubiquitin (Figure 5). The  
174 majority of residues from the N-terminal end of the  $\alpha$ 1 helix have relatively small CSP  
175 values when titrated with monoubiquitin (Figure 5A). When titrated with K63Ub<sub>2</sub>,  
176 however, the CSP values for residues from the N-terminal end of the  $\alpha$ 1 helix are larger  
177 (Figure 5B). The increased CSP values for residues at the N-terminal end of the  $\alpha$ 1  
178 helix in the presence of K63Ub<sub>2</sub> compared to monoubiquitin suggest that these residues  
179 may bind the proximal ubiquitin of K63Ub<sub>2</sub>.

180  
181 To test the hypothesis that ASCC2 residues at the N-terminal end of the  $\alpha$ 1 helix bind  
182 the proximal ubiquitin of K63Ub<sub>2</sub>, we made point mutations at ASCC2 residues E467,  
183 S470, and L471 and assayed their effects on ASCC2 CUE domain binding to K63Ub<sub>2</sub>.

184 While ITC experiments showed that the affinity of the ASCC2(465-521) L471A mutant  
185 for K63Ub<sub>2</sub> was nearly identical to that of wild-type ASCC2(465-521) (Figure 6A), the  
186 ASCC2 E467A mutant bound 3.6 – 5.0-fold more weakly, with a  $K_d$  in the range of 46.9  
187  $\mu\text{M}$  - 65.4  $\mu\text{M}$  (Figure 6B). The ASCC2 S470R mutant bound with even lower affinity,  
188 with an apparent  $K_d$  of  $90.9 \mu\text{M} \pm 23.1 \mu\text{M}$  (Figure 6C). An ASCC2 E467R/S470R  
189 double mutant bound K63Ub<sub>2</sub> with an apparent  $K_d$  of  $92.6 \mu\text{M} \pm 20.9 \mu\text{M}$  (Figure 6D).  
190 The decrease in K63Ub<sub>2</sub> binding affinity observed upon mutating the  $\alpha$ 1 helix stands in  
191 contrast to the effect observed upon altering other ASCC2 CUE domain regions that  
192 could potentially interact with the proximal ubiquitin of K63Ub<sub>2</sub>, such as the  $\alpha$ 2 helix, or  
193 the loop connecting the  $\alpha$ 2 and  $\alpha$ 3 helices, where mutations resulted in little change in  
194 binding affinity (Supplementary Figure 2). The decreased affinity observed for the E467  
195 and S470 mutant proteins is consistent with <sup>1</sup>H, <sup>15</sup>N-HSQC data (Figure 5) suggesting  
196 that the ASCC2 CUE domain binds the proximal ubiquitin of K63Ub<sub>2</sub> using a second,  
197 previously uncharacterized, interaction site located at the N-terminal end of the  $\alpha$ 1 helix.  
198 The presence of a second binding site on the ASCC2 CUE domain could account for  
199 the enhanced affinity of the ASCC2 CUE domain for K63Ub<sub>2</sub> relative to monoubiquitin  
200 and the 1:1 stoichiometry of ASCC2 CUE:K63Ub<sub>2</sub> binding (Figure 2).

201  
202 To test the functional importance of the N-terminal portion of the ASCC2 CUE domain  
203  $\alpha$ 1 helix in cells, we studied the effect of an E467R/S470R double mutation on  
204 recruitment of ASCC2 to alkylation damage-induced foci. As compared to wild-type  
205 ASCC2, the E467R/S470R double mutant had significantly reduced ASCC2 foci after  
206 alkylation damage was induced with methyl methanesulphonate (MMS) (Figures 6E and

207 6F). This mutant was expressed at levels similar to the wild-type protein, suggesting  
208 that the defect is not due to a loss of expression due to misfolding or other global defect  
209 (Supplementary Figure 3). These results are consistent with a role for the N-terminal  
210 portion of the ASCC2 CUE domain  $\alpha$ 1 helix in its recruitment during the DNA damage  
211 response.

212

### 213 **Model of the ASCC2 CUE domain binding to K63-linked diubiquitin**

214 We modeled the interaction between the proximal ubiquitin of K63Ub<sub>2</sub> and the ASCC2  
215 CUE domain using the HADDOCK protein-docking server (16,17). We first generated a  
216 model of the interaction between the ASCC2 CUE domain and the distal ubiquitin based  
217 on the gp78 CUE:monoubiquitin complex (PDB ID: 2LVO) (10) by superimposing  
218 residues 465-521 of the ASCC2 CUE domain structure (PDB ID: 2DI0) on the gp78  
219 CUE domain. Given the similarity between the CSP values for the distal ubiquitin of  
220 K63Ub<sub>2</sub> titrated with the ASCC2 CUE domain (Figure 3A) and the CSP values for  
221 monoubiquitin titrated with the gp78 CUE domain (10), it is likely that these interactions  
222 are structurally similar. Distance restraints based on NMR CSP data and mutagenesis  
223 data were utilized by the HADDOCK server to guide the docking of the proximal  
224 ubiquitin of K63Ub<sub>2</sub> to the ASCC2 CUE domain. ASCC2 residues E467 and S470, and  
225 proximal ubiquitin residues E64 and T66, were specified as residues likely to be at the  
226 binding interface based on the deleterious effect of substitutions at these residues on  
227 binding (Figures 4B and 6B-D). In addition, proximal ubiquitin residues with CSP values  
228 greater than  $2\sigma$  were also specified as likely to be at the interface with ASCC2. These

229 proximal ubiquitin residues include A46, G47, K48, Q49, and L71. The resulting model  
230 of the ASCC2(465-521):K63Ub<sub>2</sub> complex is shown in Figure 7.

231

## 232 **Discussion**

233

234 The preferential binding of ASCC2 to K63-linked polyubiquitin chains stands in contrast  
235 to other CUE domain proteins, which show more modest enhancement of binding to  
236 mono- versus polyubiquitin and little selectivity among polyubiquitin chain types (10,12).  
237 We found that the affinity of the ASCC2 CUE domain for K63Ub<sub>2</sub> is approximately 4 – 7-  
238 fold stronger than its affinity for monoubiquitin and that the ASCC2 CUE domain binds  
239 to di- and tetraubiquitin in a ratio of one CUE domain per diubiquitin (Figure 2). While  
240 interactions with the distal ubiquitin are similar to those observed for other CUE  
241 domains bound to monoubiquitin (8-12), ASCC2 contacts the proximal ubiquitin in a  
242 non-canonical manner using residues from the N-terminal portion of the  $\alpha$ 1 helix  
243 (Figures 5 & 6). By contrast, CUE domains from other proteins, such as Cue1 and gp78,  
244 make fewer contacts with adjacent ubiquitins within polyubiquitin chains and,  
245 accordingly, exhibit smaller enhancements in their affinities for polyubiquitin chains  
246 compared to monoubiquitin (10,11). For example, the CUE domain from the protein  
247 Cue1 binds to the I44 patch of the proximal ubiquitin in K48Ub<sub>2</sub> while also contacting  
248 G75 and the C-terminus of the distal ubiquitin (11). The  $K_d$  for the Cue1 CUE domain  
249 binding K48Ub<sub>2</sub> is 95  $\mu$ M, compared to 173  $\mu$ M for binding to monoubiquitin (11). This  
250 enhancement is much more modest than the 4 – 7-fold enhancement observed for the  
251 ASCC2 CUE domain. The gp78 CUE domain contacts T66 of the proximal ubiquitin in

252 K48Ub<sub>2</sub> while binding the I44 patch of the distal ubiquitin, resulting in an enhancement  
253 in affinity for the distal ubiquitin in K48Ub<sub>2</sub> relative to the proximal ubiquitin (10). Overall,  
254 however, the gp78 CUE domain binds K48Ub<sub>2</sub> and monoubiquitin with virtually equal  
255 affinity of about 12.4 μM and 12.8 μM, respectively (10). Despite the modest  
256 enhancement in affinity for polyubiquitin chains exhibited by the gp78 and Cue1 CUE  
257 domains, interacting with adjacent ubiquitins simultaneously is important for their  
258 biological functions. For these CUE domains, the interactions described above properly  
259 position ubiquitin ligases to add to growing polyubiquitin chains (10,11). For the ASCC2  
260 CUE domain, interactions with adjacent ubiquitins strengthen the affinity for ASCC2's  
261 biologically relevant target, K63-linked polyubiquitin chains (Figure 2), and increase the  
262 recruitment of the ALKBH3-ASCC repair complex to alkylation damage sites (Figures  
263 6E-F).

264  
265 While the ASCC2 CUE domain has been shown to bind K63Ub<sub>2</sub> with enhanced affinity  
266 relative to M1Ub<sub>2</sub> and K48Ub<sub>2</sub>, the structural basis for this selectivity has not been fully  
267 elucidated. Linear polyubiquitin chains, and possibly K48-linked polyubiquitin chains,  
268 can adopt similar conformations to the K63-linked polyubiquitin chain shown in Figure 7  
269 (14,15), and interact with the same surfaces of the ASCC2 CUE domain. The affinity of  
270 the ASCC2 CUE domain for M1Ub<sub>2</sub> and K48Ub<sub>2</sub> relative to K63Ub<sub>2</sub> is much weaker,  
271 however (Figure 2). We speculate that ASCC2 CUE domain interactions with proximal  
272 ubiquitin residues near the K63 isopeptide linkage, including residues E64 and T66,  
273 contribute to the selectivity for K63-linked polyubiquitin. Consistent with this, we found  
274 that alanine substitutions of proximal ubiquitin residues E64 and T66 reduced the affinity

275 for K63Ub<sub>2</sub> by about 3.5 – 7.0-fold (Figure 4). Furthermore, it is not known which  
276 proximal ubiquitin surface in K63Ub<sub>2</sub> interacts with the N-terminal portion of the ASCC2  
277 CUE domain  $\alpha$ 1 helix and whether the proximal ubiquitins of M1Ub<sub>2</sub> and K48Ub<sub>2</sub> are  
278 capable of making similar contacts. Elucidating the structural details of the interactions  
279 between K63Ub<sub>2</sub> residues E64, T66, and the proximal ubiquitin as a whole, with the  
280 ASCC2 CUE domain will be the subject of continued investigation of the basis for  
281 ASCC2 domain selectivity.

282

283

## 284 **Experimental Procedures**

285 *Plasmids for protein expression.* ASCC2 constructs containing amino acids 457-525 or  
286 465-521 were inserted into a pPROEX HTa vector with an N-terminal polyhistidine tag  
287 followed by a tobacco etch virus (TEV) protease recognition sequence. Full-length  
288 ASCC2 was inserted into the pET28 vector. Wild-type ubiquitin residues 1-76 (wt Ub),  
289 along with mutant ubiquitin constructs containing K48R/K63R substitutions (K48R/K63R  
290 Ub) or a D77 extension (D77 Ub), were inserted into the pET-3a vector.

291

292 *Plasmids for cell-based studies.* Full-length human ASCC2 cDNA cloned into pENTR-  
293 3C and pET-28a-Flag was previously described (7). The ASCC2 E467R/S470R mutant  
294 cDNA was synthesized (IDT), cloned into pENTR-3C and pET-28a-Flag, and confirmed  
295 by Sanger sequencing. For human cell expression, ASCC2 E467R/S470R was  
296 subcloned into pHAGE-CMV-3XHA using Gateway recombination.

297

298 *Expression and purification of the ASCC2 CUE domain*

299 BL21 DE3 *E. coli* cells were transformed with pPROEX HTa vector containing the  
300 ASCC2 constructs, plated on LB agar containing 100 µg/mL ampicillin, and incubated  
301 overnight at 37°C. Single colonies were used to inoculate 5-mL aliquots of LB media  
302 with 100 µg/mL ampicillin. The 5-mL cultures were grown overnight at 37°C with 250  
303 rpm shaking until saturation. The 5-mL colonies were used to inoculate 1-L cultures of  
304 LB media with 100 µg/mL ampicillin, which were grown at 37°C with 250 rpm shaking  
305 until reaching an OD<sub>600</sub> between 0.5 and 0.8. Protein expression was induced by adding  
306 0.5 mM IPTG, and allowed to continue overnight at 16°C with 250 rpm shaking.  
307 Following protein expression, cell were pelleted by centrifugation, resuspended in a  
308 buffer consisting of 50 mM Tris pH 7.5 and 1 mM PMSF, and lysed by sonication on ice.  
309 Cell lysate was centrifuged at 17,500 x g for 30 minutes at 4°C, passed through a filter  
310 with 0.22 µm pore size, and loaded onto a 5-mL HisTrap column (Cytiva life sciences)  
311 that had been equilibrated in Buffer A (50 mM Tris pH 7.5, 250 mM NaCl, 10 mM  
312 imidazole, and 200 µM TCEP). The His-tagged ASCC2 CUE domain that was retained  
313 by the HisTrap column was eluted by running a gradient from 0% to 100% Buffer B (50  
314 mM Tris pH 7.5, 250 mM NaCl, 400 mM imidazole, and 200 µM TCEP) over 100 mL.  
315 Fractions judged to contain His-tagged ASCC2 CUE domain by gel electrophoresis  
316 were combined and incubated with His-tagged TEV protease while being dialyzed in  
317 Buffer A overnight at 4°C. The dialyzed sample was then repassed over a HisTrap  
318 column equilibrated in Buffer A, and the flowthrough containing the untagged ASCC2  
319 CUE domain was collected and concentrated to less than 5 mL. The concentrated  
320 ASCC2 CUE domain solution was passed over a Superdex 75 16/60 size-exclusion



321 column (Cytiva life sciences) equilibrated in 20 mM HEPES pH 7.6, 150 mM NaCl, and  
322 200  $\mu$ M TCEP. The ASCC2 CUE domain eluted from the column as a single peak  
323 roughly 85 mL after injection.

324

### 325 *Expression and purification of full-length ASCC2*

326 *E. coli* Rosetta (DE3) cells were transformed with pET-28 vector containing full-length  
327 ASCC2 and grown on LB agar plates with kanamycin and chloramphenicol. The  
328 resulting colonies were used to inoculate 5 mL cultures of LB media with kanamycin and  
329 chloramphenicol, which were grown overnight at 37°C and 250 rpm shaking until  
330 reaching saturation. The 5-mL cultures were used to inoculate 1-L cultures of LB media  
331 with kanamycin and chloramphenicol that were grown at 37°C and 250 rpm shaking  
332 until reaching an OD<sub>600</sub> between 0.5 and 0.8. Once the cells had reached the  
333 appropriate density, the temperature was lowered to 16°C and ASCC2 expression was  
334 induced by adding 500  $\mu$ L of 1 M IPTG. After approximately 16 hours, the cells were  
335 harvested by centrifuging at 5,000 rpm for 20 minutes. The cells were resuspended in  
336 100 mL of lysis buffer (50 mM Tris pH 7.5, 250 mM NaCl, 20 mM imidazole, 3 mM  $\beta$ -  
337 mercaptoethanol, 2  $\mu$ M PMSF, and one cOmplete Mini, EDTA-free protease-inhibitor  
338 tablet (Roche)), lysed using a microfluidizer, and then centrifuged at 14,000 rpm for 30  
339 minutes at 4°C to separate the soluble and insoluble fractions. The soluble fraction was  
340 then passed through syringe filters with 0.45-micron and 0.22-micron pore sizes prior to  
341 being loaded onto a 5-mL HisTrap column (Cytiva life sciences) that had been  
342 equilibrated in Buffer A (50 mM Tris pH 7.5, 250 mM NaCl, 20 mM imidazole, 3 mM  $\beta$ -  
343 mercaptoethanol). His-tagged, full-length ASCC was eluted from the column using a

344 gradient from 0% to 100% Buffer B (50 mM Tris pH 7.5, 250 mM NaCl, 400 mM  
345 imidazole, 3 mM  $\beta$ -mercaptoethanol) over 50 mL. Fractions containing full-length  
346 ASCC2, as determined by SDS-PAGE, were concentrated to less than 5 mL total  
347 volume and passed over a Superdex 200 16/60 size-exclusion column (Cytiva Life  
348 Sciences) that had been equilibrated in a buffer consisting of 20 mM HEPES pH 7.5,  
349 150 mM NaCl, and 200  $\mu$ M HEPES. Full-length ASCC2 eluted from the Superdex 200  
350 16/60 size-exclusion column 60-70 mL after injection.

351

### 352 *Expression and purification of monoubiquitin*

353 BL21 DE3 *E. coli* cells were transformed with pET-3a vector containing the ubiquitin  
354 constructs, plated on LB agar containing 100  $\mu$ g/mL ampicillin, and incubated overnight  
355 at 37°C. Single colonies were used to inoculate 5-mL aliquots of LB media with 100  
356  $\mu$ g/mL ampicillin. The 5-mL cultures were grown overnight at 37°C with 250 rpm shaking  
357 until saturation. The 5-mL colonies were used to inoculate 1-L cultures of LB media with  
358 100  $\mu$ g/mL ampicillin, which were grown at 37°C with 250 rpm shaking until reaching an  
359 OD<sub>600</sub> between 0.5 and 0.8. Protein expression was induced by adding 0.5 mM IPTG,  
360 and allowed to continue overnight at 16°C with 250 rpm shaking. Following protein  
361 expression, cell were pelleted by centrifugation, resuspended in a buffer consisting of  
362 50 mM Tris pH 7.5 and 1 mM PMSF, and lysed by sonication on ice. Cell lysate was  
363 centrifuged at 17,500 x g for 30 minutes at 4°C, after which the soluble fraction was  
364 separated and slowly stirred on ice. To the stirring soluble fraction, 1% (v/v) of 70%  
365 perchloric acid was added dropwise until the solution turned a milky white. This solution  
366 was centrifuged at 17,500 x g for 30 minutes at 4°C after which the soluble fraction

367 containing the ubiquitin was separated from the pellet. The soluble fraction was then  
368 subjected to multiple rounds of dialysis in 10 mM Tris pH 7.6 until reaching a neutral pH.

369

### 370 *Conjugation and purification of polyubiquitin chains*

371 Polyubiquitin chains were assembled enzymatically by combining monoubiquitin (>1  
372 mM), human UBE1 enzyme (500 nM), and *S. cerevisiae* Ubc13/Mms2 (2.5  $\mu$ M) in a  
373 solution containing 50 mM HEPES pH 7.5, 10 mM MgCl<sub>2</sub>, 1 mM TCEP, and 10 mM  
374 ATP. To limit the chain length to diubiquitin, K48R/K63R ubiquitin and D77 ubiquitin can  
375 be substituted for wild-type ubiquitin in the reaction mixture (18). Human UBE1 and *S.*  
376 *cerevisiae* Ubc13/Mms2 enzymes were expressed and purified as previously described  
377 (19,20). The reaction mixture was incubated overnight at 37°C and then diluted 10-fold  
378 in Buffer A (50 mM ammonium acetate pH 4.5 and 50 mM NaCl) and loaded onto a  
379 monoS 10/100 GL column (Cytiva life sciences) equilibrated in buffer A. The ubiquitin  
380 species retained by the column were eluted by running a gradient from 0-100% buffer B  
381 (50 mM ammonium acetate pH 4.5 and 600 mM NaCl) over 300 mL.

382

### 383 *Isothermal titration calorimetry binding experiments and data analysis*

384 For ITC experiments involving K63Ub<sub>2</sub>, distal ubiquitins contained K48R/K63R  
385 mutations and proximal ubiquitins contained D77 mutations to control the polyubiquitin  
386 chain length, as described above. For the monoubiquitin binding experiment in Figure  
387 2A, K48R/K63R ubiquitin was used. Prior to each isothermal titration calorimetry  
388 experiment, proteins were dialyzed overnight in a solution of 20 mM HEPES pH 7.5,  
389 150 mM NaCl, and 200  $\mu$ M TCEP. Using a MicroCal iTC<sub>200</sub> instrument (Malvern),

390 titrations were conducted using a series of 2- $\mu$ L injections each lasting four seconds,  
391 with a minimum of two minutes between injections. Fitting was performed using Origin 7  
392 SR4 (OriginLab). To extract  $K_d$  information from non-sigmoidal isotherms, N values  
393 were fixed by altering the active concentrations in the cell and syringe during fitting. The  
394 first  $K_d$  value in the range corresponds to varying the active concentration in the cell and  
395 the second  $K_d$  value in the range corresponds to varying the active concentration in the  
396 syringe.

397

### 398 *Chemical shift mapping experiments*

399  $^{15}$ N-labeled ASCC2(465-521) and K63-linked diubiquitin were made following similar  
400 expression and purification protocols to those described above, however, after reaching  
401 an  $OD_{600}$  between 0.5 and 0.8, the 1-L aliquots of cells were pelleted, washed with M9  
402 salts, and resuspended in one-third the original volume of minimal media containing  
403  $^{15}$ N-labeled ammonium chloride. The resuspended cells recovered for 1 hour at 37°C  
404 with 225 rpm shaking prior to proceeding with the induction of protein expression as  
405 described above.

406

407  $^1\text{H},^{15}\text{N}$ -HSQC spectra of ASCC2(465-521) and ubiquitin were recorded using a 600  
408 MHz AVANCE II NMR system at the Biomolecular NMR Center at Johns Hopkins  
409 University. Resonances in the  $^1\text{H},^{15}\text{N}$ -HSQC spectra of ubiquitin were assigned based  
410 on data from Dr. Carlos Castañeda (personal communication). Resonance assignments  
411 for the ASCC2(465-521)  $^1\text{H},^{15}\text{N}$ -HSQC spectra were obtained from 3D  $^{15}\text{N}$ -edited  $^1\text{H}$ - $^1\text{H}$   
412 NOESY-HSQC and  $^{15}\text{N}$ -edited  $^1\text{H}$ - $^1\text{H}$  TOCSY-HSQC spectra. NMR data were

413 processed using nmrPipe software (21) and CSP values were measured using the  
414 formula  $d = \sqrt{\delta_H^2 + (0.15\delta_N)^2}$  by the program CcpNmr Analysis (22) on the NMRBox  
415 platform (23). The CSP values in Figures 3 were measured for the titration of 100  $\mu\text{M}$   
416 K63Ub<sub>2</sub>, <sup>15</sup>N-labeled on the distal ubiquitin in Figure 3A and <sup>15</sup>N-labeled on the proximal  
417 ubiquitin in Figure 3B, with 30  $\mu\text{M}$ , 100  $\mu\text{M}$ , 200  $\mu\text{M}$ , and 500  $\mu\text{M}$  ASCC2(465-521) at  
418 20°C. The CSP values in Figure 5A were measured for 20  $\mu\text{M}$  <sup>15</sup>N-labeled ASCC2(465-  
419 521) alone and in the presence of 681  $\mu\text{M}$  K48R/K63R ubiquitin at 40°C in a buffer  
420 consisting of 20 mM Tris pH 7.0, 100 mM NaCl, and 200  $\mu\text{M}$  TCEP. The CSP values in  
421 Figure 5B were measured for the titration of 20  $\mu\text{M}$  <sup>15</sup>N-labeled ASCC2(465-521) with 6  
422  $\mu\text{M}$ , 20  $\mu\text{M}$ , and 40  $\mu\text{M}$  K63Ub<sub>2</sub> at 40°C in a buffer consisting of 20 mM Tris pH 7.0, 100  
423 mM NaCl, and 200  $\mu\text{M}$  TCEP. In Figures 3 and 5, resonances that disappeared during  
424 the course of the titration are marked by an asterisk at the pinnacle of their  
425 corresponding bar and assigned values of 0.3 or 0.25 ppm, respectively. NMR data,  
426 chemical shift assignments, and CSP values for <sup>15</sup>N-labeled ASCC2 CUE domain  
427 titrated with monoubiquitin and K63Ub<sub>2</sub> have been deposited to the Biological Magnetic  
428 Resonance Data Bank (24) as entries 51130 and 51139, respectively. NMR data,  
429 chemical shift assignments, and CSP values for <sup>15</sup>N-labeled K63Ub<sub>2</sub> titrated with the  
430 ASCC2 CUE domain have been deposited to the Biological Magnetic Resonance Data  
431 Bank (24) as entries 51145 (<sup>15</sup>N-labeled on the proximal ubiquitin) and 51146 (<sup>15</sup>N-  
432 labeled on the distal ubiquitin).

433

434 *Determining ASCC2 CUE domain binding affinity for monoubiquitin using CSP data*

435 The program CcpNmr Analysis (22) used information from the titration of  $^{15}\text{N}$ -labeled  
436 ASCC2(465-521) with monoubiquitin, as described in the previous section, to determine  
437 the  $K_d$  value for ASCC2(465-521) binding monoubiquitin using the formula

438  $y = A(B + x - \sqrt{(B + x)^2 - 4x})$  where  $y = \delta_{\text{obs}}$ ,  $A = \delta_{\infty}/2$ ,  $B = 1 + K_d/a$ ,  $a = [\text{ASCC2}]_{\text{tot}}$ ,  $b$

439  $= [\text{Ub}]_{\text{tot}}$ ,  $x = b/a$ . The  $K_d$  value of  $39.6 \mu\text{M} \pm 1.6 \mu\text{M}$  reported in Supplementary Figure 1  
440 is the average of the  $K_d$  values determined for residues L478, L479, Q500, and L506.

441 These four residues have the largest CSP values recorded for the titration of  $^{15}\text{N}$ -  
442 labeled ASCC2(465-521) with monoubiquitin and are all predicted to be at the  
443 ASCC2:ubiquitin binding interface.

444

445 *Modeling the ASCC2 CUE:K63Ub<sub>2</sub> complex using PyMOL and the HADDOCK server*

446 The PyMOL molecular visualization system (25) and the HADDOCK protein-docking  
447 server (16,17) were used to model the interaction between the ASCC2 CUE domain  
448 and K63Ub<sub>2</sub>. First, the interaction between the ASCC2 CUE domain and the distal  
449 ubiquitin was modeled based on the solution structure of the gp78 CUE:monoubiquitin  
450 complex (PDB ID: 2LVO) (10). PyMOL was used to superimpose the solution structure  
451 of the ASCC2 CUE domain (PDB ID: 2DI0) with the structure of the gp78 CUE domain  
452 in the ubiquitin-bound complex. The HADDOCK server was then used to model the  
453 interaction between the proximal ubiquitin and the ASCC2 CUE domain. To guide the  
454 docking experiment, proximal ubiquitin residues with CSP values greater than  $2\sigma$ , or  
455 resonances that disappeared during the NMR titration, were identified as “active”  
456 residues. For the ASCC2 CUE domain, residues outside of the conserved hydrophobic  
457 patch that decrease the ubiquitin-binding affinity when mutated were identified as active.

458 For the reported model, the active proximal ubiquitin residues were A46, G47, K48,  
459 Q49, E64, T66, and L71, and the active ASCC2 CUE domain residues were E467 and  
460 S470. Additionally, a distance restraint of 1.32 Å between the carbonyl carbon of G76 of  
461 the distal ubiquitin and the ε-amino group of K63 of the proximal ubiquitin was used to  
462 approximate the isopeptide linkage in the diubiquitin chain. The reported model is the  
463 best structure from the highest scoring cluster.

464

#### 465 *Immunofluorescence analysis of HA-tagged ASCC2*

466 All immunofluorescence analysis was performed in U2OS cells using wild-type and  
467 mutant forms of ASCC2, expressed in the pHAGE-CMV-3xHA lentivirus (7). Three days  
468 after transduction, the cells were treated with 500 μM MMS in complete DMEM media  
469 for six hours. U2OS cells were washed once with ice-cold PBS, then extracted with 1×  
470 PBS containing 0.2% Triton X-100 and protease inhibitors (Pierce) for 10–20 min on ice  
471 before fixation with 3.2% paraformaldehyde. The cells were then washed extensively  
472 with immunofluorescence wash buffer (1× PBS, 0.5% NP-40, and 0.02% NaN<sub>3</sub>), then  
473 blocked with immunofluorescence blocking buffer (immuno- fluorescence wash buffer  
474 plus 10% FBS) for at least 30 min. Primary antibodies were diluted in  
475 immunofluorescence blocking buffer overnight at 4 °C. After staining with secondary  
476 antibodies (conjugated with Alexa Fluor 488 or 594; Millipore) and Hoechst 33342  
477 (Sigma-Aldrich), where indicated, samples were mounted using Prolong Gold mounting  
478 medium (Invitrogen). Epifluorescence microscopy was performed on an Olympus  
479 fluorescence microscope (BX-53) using an ApoN 60×/1.49 numerical aperture oil  
480 immersion lens or an UPlanS-Apo 100×/1.4 numerical aperture oil immersion lens and

481 cellSens Dimension software. Raw images were exported into Adobe Photoshop, and  
482 for any adjustments in image contrast or brightness, the levels function was applied. For  
483 foci quantification, at least 100 cells were analyzed in triplicate.

484

#### 485 ***Data Availability***

486 NMR data reported in this manuscript have been deposited in the Biological Magnetic  
487 Resonance Data Bank as entries 51130 ( $^{15}\text{N}$ -labeled ASCC2 CUE domain interacting  
488 with monoubiquitin), 51139 ( $^{15}\text{N}$ -labeled ASCC2 CUE domain interacting with K63Ub<sub>2</sub>),  
489 51145 (K63Ub<sub>2</sub>  $^{15}\text{N}$ -labeled on the proximal ubiquitin interacting with the ASCC2 CUE  
490 domain), and 51146 (K63Ub<sub>2</sub>  $^{15}\text{N}$ -labeled on the distal ubiquitin interacting with the  
491 ASCC2 CUE domain).

492

#### 493 ***Acknowledgements***

494 The authors acknowledge Dr. Stoyan Milev for his assistance interpreting ITC data with  
495 low C values and Drs. Aswani Kumar Kancherla and Dominique Frueh for their help  
496 processing and analyzing NMR data. The authors also thank Dr. Carlos Castañeda for  
497 providing the assignments from a previously recorded  $^1\text{H},^{15}\text{N}$ -HSQC ubiquitin spectrum  
498 that served as a guide for the ubiquitin assignments in this manuscript.

499

#### 500 ***Funding and additional information***

501 Research reported in this publication was supported by National Institute of General  
502 Medical Sciences awards GM140410 (P.M.L.) and GM130393 (C.W.), National Cancer  
503 Institute awards CA227001 and CA092584 (N.M.), and American Cancer Society



504 research scholar grant RSG-18-156-01-DMC (N.M.). J.G.B and L.N.G were supported  
505 by NSF S-STEM Award 1458490. This study made use of NMRbox: National Center for  
506 Biomolecular NMR Data Processing and Analysis, a Biomedical Technology Research  
507 Resource (BTRR), which is supported by the National Institute of General Medical  
508 Sciences (GM111135). The content is solely the responsibility of the authors and does  
509 not necessarily represent the official views of the National Institutes of Health.

510

### 511 **Conflict of interest statement**

512 The authors declare that they have no conflicts of interest with the contents of this  
513 article.

514

### References

- 515 1. Chen, X., Htet, Z. M., Lopez-Alfonzo, E., Martin, A., and Walters, K. J. (2020) *FEBS J*
- 516 2. Jackson, S. P., and Durocher, D. (2013) *Mol Cell* **49**, 795-807
- 517 3. Morgan, M. T., and Wolberger, C. (2017) *Curr Opin Struct Biol* **42**, 75-82
- 518 4. Dye, B. T., and Schulman, B. A. (2007) *Annu Rev Biophys Biomol Struct* **36**, 131-150
- 519 5. Komander, D., and Rape, M. (2012) *Annu Rev Biochem* **81**, 203-229
- 520 6. Randles, L., and Walters, K. J. (2012) *Front Biosci (Landmark Ed)* **17**, 2140-2157
- 521 7. Brickner, J. R., Soll, J. M., Lombardi, P. M., Vagbo, C. B., Mudge, M. C., Oyeniran, C., Rabe, R.,  
522 Jackson, J., Sullender, M. E., Blazosky, E., Byrum, A. K., Zhao, Y., Corbett, M. A., Gecz, J., Field, M.,  
523 Vindigni, A., Slupphaug, G., Wolberger, C., and Mosammamarast, N. (2017) *Nature* **551**, 389-393
- 524 8. Kang, R. S., Daniels, C. M., Francis, S. A., Shih, S. C., Salerno, W. J., Hicke, L., and Radhakrishnan,  
525 I. (2003) *Cell* **113**, 621-630
- 526 9. Prag, G., Misra, S., Jones, E. A., Ghirlando, R., Davies, B. A., Horazdovsky, B. F., and Hurley, J. H.  
527 (2003) *Cell* **113**, 609-620
- 528 10. Liu, S., Chen, Y., Li, J., Huang, T., Tarasov, S., King, A., Weissman, A. M., Byrd, R. A., and Das, R.  
529 (2012) *Structure* **20**, 2138-2150
- 530 11. von Delbruck, M., Kniss, A., Rogov, V. V., Pluska, L., Bagola, K., Lohr, F., Guntert, P., Sommer, T.,  
531 and Dotsch, V. (2016) *Mol Cell* **62**, 918-928
- 532 12. Shih, S. C., Prag, G., Francis, S. A., Sutanto, M. A., Hurley, J. H., and Hicke, L. (2003) *EMBO J* **22**,  
533 1273-1281
- 534 13. Williamson, M. P. (2013) *Prog Nucl Magn Reson Spectrosc* **73**, 1-16
- 535 14. Datta, A. B., Hura, G. L., and Wolberger, C. (2009) *J Mol Biol* **392**, 1117-1124
- 536 15. Komander, D., Reyes-Turcu, F., Licchesi, J. D., Odenwaelder, P., Wilkinson, K. D., and Barford, D.  
537 (2009) *EMBO Rep* **10**, 466-473

- 538 16. Dominguez, C., Boelens, R., and Bonvin, A. M. (2003) *J Am Chem Soc* **125**, 1731-1737  
539 17. van Zundert, G. C. P., Rodrigues, J., Trellet, M., Schmitz, C., Kastiris, P. L., Karaca, E., Melquiond,  
540 A. S. J., van Dijk, M., de Vries, S. J., and Bonvin, A. (2016) *J Mol Biol* **428**, 720-725  
541 18. Pickart, C. M., and Raasi, S. (2005) *Methods Enzymol* **399**, 21-36  
542 19. Berndsen, C. E., Wiener, R., Yu, I. W., Ringel, A. E., and Wolberger, C. (2013) *Nat Chem Biol* **9**,  
543 154-156  
544 20. Berndsen, C. E., and Wolberger, C. (2011) *Anal Biochem* **418**, 102-110  
545 21. Delaglio, F., Grzesiek, S., Vuister, G. W., Zhu, G., Pfeifer, J., and Bax, A. (1995) *J Biomol NMR* **6**,  
546 277-293  
547 22. Vranken, W. F., Boucher, W., Stevens, T. J., Fogh, R. H., Pajon, A., Llinas, M., Ulrich, E. L.,  
548 Markley, J. L., Ionides, J., and Laue, E. D. (2005) *Proteins* **59**, 687-696  
549 23. Maciejewski, M. W., Schuyler, A. D., Gryk, M. R., Moraru, I., Romero, P. R., Ulrich, E. L.,  
550 Eghbalnia, H. R., Livny, M., Delaglio, F., and Hoch, J. C. (2017) *Biophys J* **112**, 1529-1534  
551 24. Ulrich, E. L., Akutsu, H., Doreleijers, J. F., Harano, Y., Ioannidis, Y. E., Lin, J., Livny, M., Mading, S.,  
552 Maziuk, D., Miller, Z., Nakatani, E., Schulte, C. F., Tolmie, D. E., Kent Wenger, R., Yao, H., and  
553 Markley, J. L. (2008) *Nucleic Acids Res* **36**, D402-408  
554 25. The PyMOL Molecular Graphics System, Version 2.1.1 Schrödinger, LLC. .  
555

## 556 **Abbreviations and nomenclature**

557 ALKBH3, Alpha-ketoglutarate-dependent dioxygenase alkB homolog 3; ASCC2,  
558 Activating Signal Cointegrator 1 Complex Subunit 2; ASCC3, Activating Signal  
559 Cointegrator 1 Complex Subunit 3; ATP, adenosine triphosphate; BBR2, pre-mRNA  
560 splicing helicase BRR2; CSP, chemical shift perturbation; CUE, coupling of ubiquitin  
561 conjugation to ER degradation; DTT, dithiothreitol; HADDOCK, High Ambiguity Driven  
562 protein-protein DOCKing; HSQC, Heteronuclear Single Quantum Coherence; ITC,  
563 isothermal titration calorimetry; PMSF, phenylmethylsulfonyl fluoride; ppm, parts per  
564 million; RNF113A, ring finger protein RNF113A; RMSD, root-mean-square deviation;  
565 rpm, revolutions per minute; TCEP, Tris (2-carboxyethyl) phosphine; TEV, tobacco etch  
566 virus

567

568

569

570

571

572 **Figures and Figure Legends**

573

574

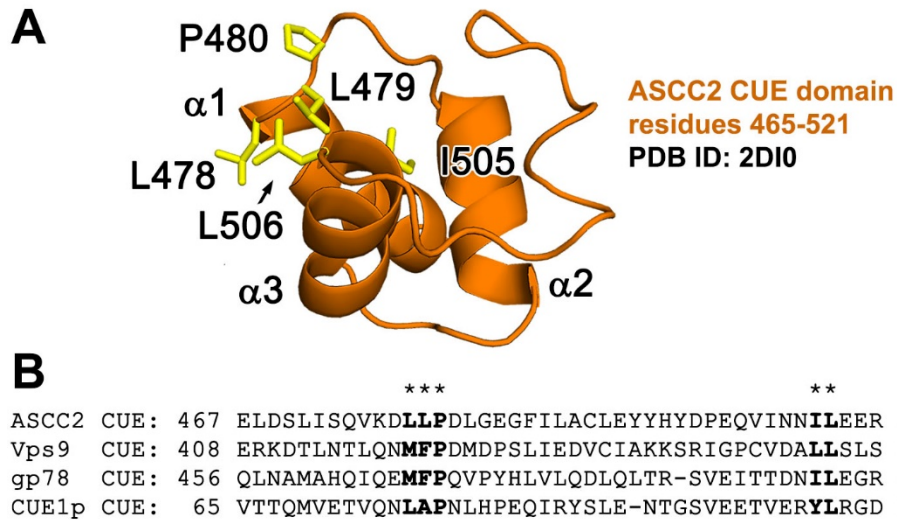

576

577 Figure 1. The ASCC2 CUE domain. (A) The ASCC2 CUE domain folds into a three-  
578 helix bundle. (B) CUE domains contain conserved sequence motifs on the  $\alpha 1$  and  $\alpha 3$   
579 helices (in bold, below asterisks) that form a hydrophobic ubiquitin-binding surface  
580 (yellow sticks in figure 1A).

581

582

583

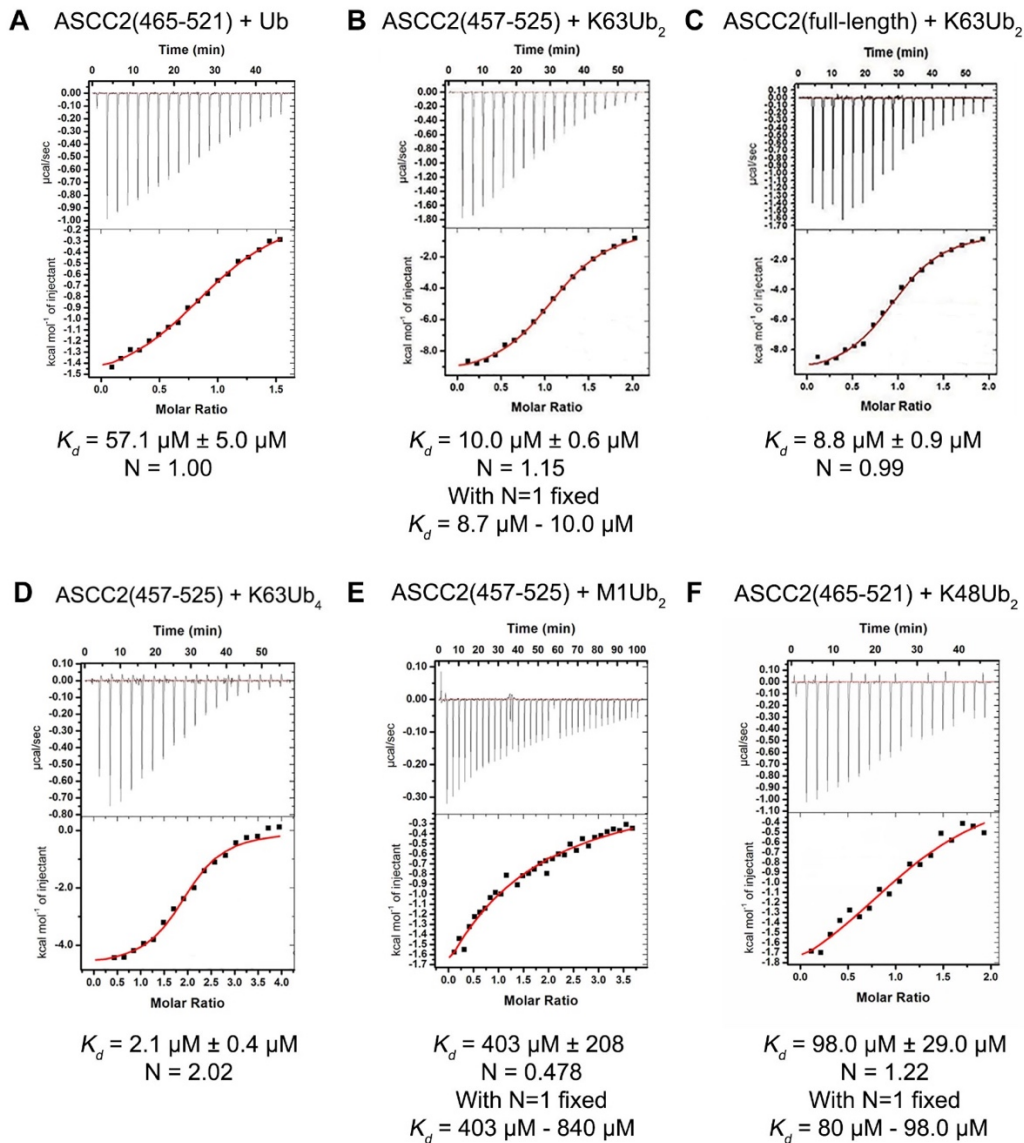

585

586

587 Figure 2. The ASCC2 CUE domain binds K63Ub<sub>2</sub> with enhanced affinity and 1:1  
 588 stoichiometry. (A-C) ITC data show that full-length ASCC2 and isolated ASCC2 CUE  
 589 domain bind K63Ub<sub>2</sub> with greater affinity than monoubiquitin (Ub). (D) Two ASCC2 CUE  
 590 domains bind per K63-linked tetraubiquitin chain (K63Ub<sub>4</sub>). This 1:1 ASCC2 CUE  
 591 domain to K63Ub<sub>2</sub> ratio is observed in Figures 2B and 2C as well. (E) The ASCC2 CUE  
 592 domain does not exhibit enhanced binding affinity for linear diubiquitin (M1Ub<sub>2</sub>) or (F)  
 593 K48-linked diubiquitin (K48Ub<sub>2</sub>).

594

595

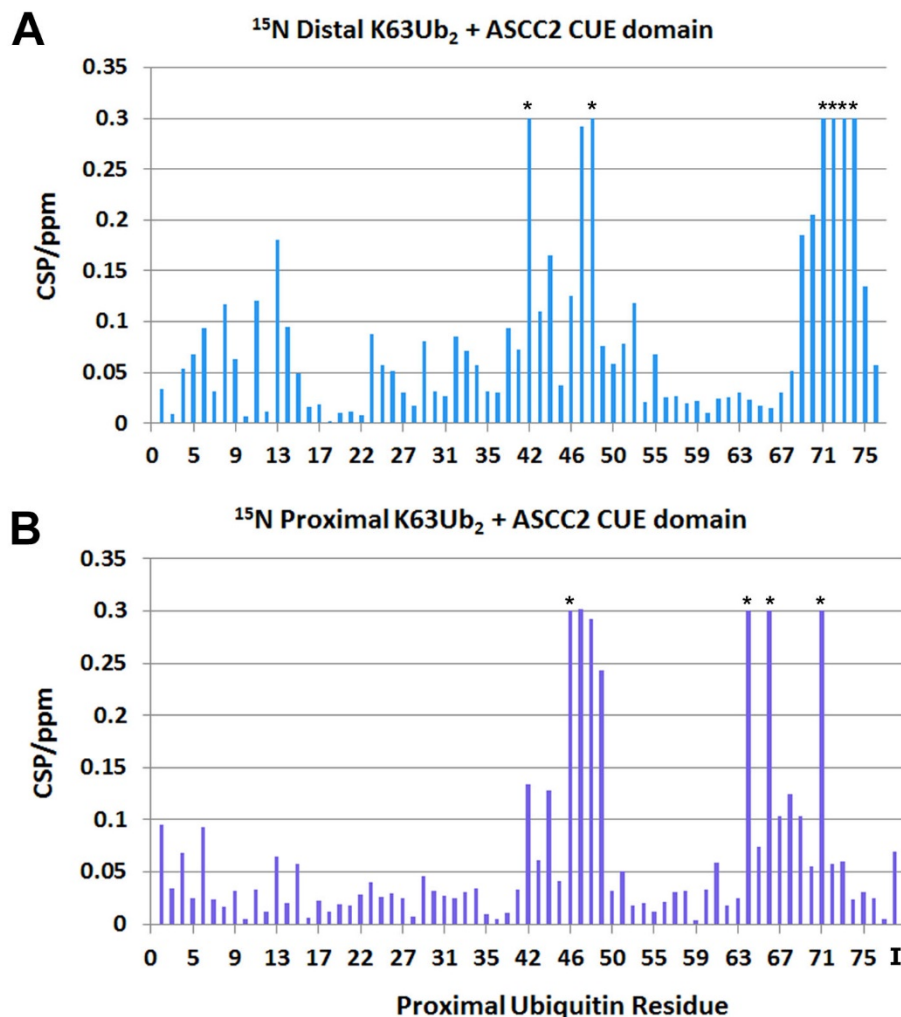

597

598 Figure 3. The ASCC2 CUE domain makes different interactions with the distal and  
599 proximal ubiquitins of K63Ub<sub>2</sub>. Differences in the CSP values recorded for the  $^{15}\text{N}$ -  
600 labeled distal (A) and proximal (B) ubiquitins of K63Ub<sub>2</sub> titrated with the ASCC2 CUE  
601 domain suggest that ASCC2 makes different contacts with the distal and proximal  
602 ubiquitin. An asterisk (\*) indicates the resonance disappeared during the titration. The  
603 "I" in Figure 3B denotes the K63Ub<sub>2</sub> isopeptide bond.

604

605

606

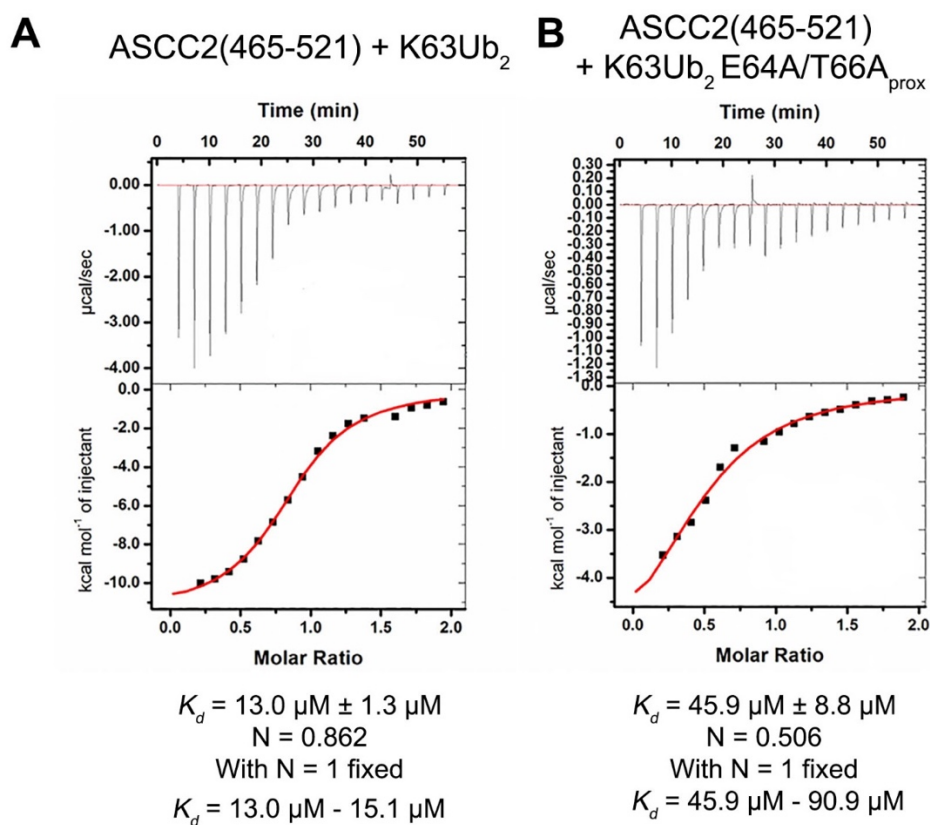

608

609

610 Figure 4. The ASCC2 CUE domain binds K63Ub<sub>2</sub> E64A/T66A<sub>prox</sub> with reduced affinity  
611 relative to wild-type K63Ub<sub>2</sub>. ITC data show that ASCC2(465-521) binds wild-type  
612 K63Ub<sub>2</sub> (A) with ~3.5-7.0X greater affinity than K63Ub<sub>2</sub> E64A/T66A<sub>prox</sub> (B).

613

614

615

616

617

618

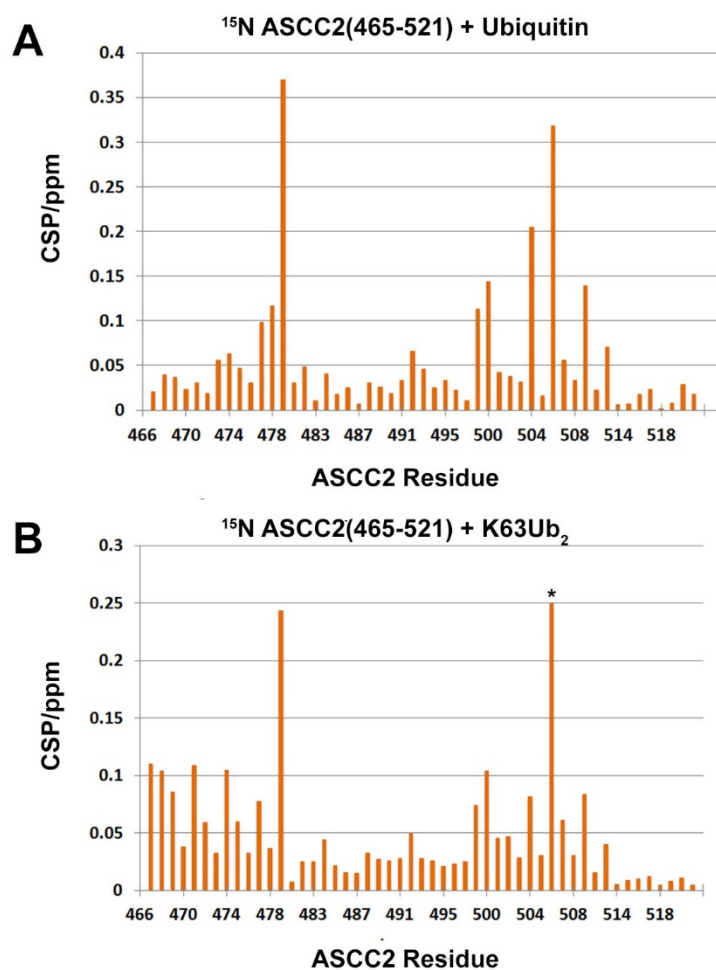

620 Figure 5. The ASCC2 CUE domain utilizes conserved sequences from the  $\alpha 1$  and  $\alpha 3$   
621 helices, along with the N-terminal end of the  $\alpha 1$  helix, to bind K63-linked polyubiquitin  
622 chains. CSP values recorded from the  $^1\text{H}$ - $^{15}\text{N}$ -HSQC spectra of  $^{15}\text{N}$ -labeled ASCC2  
623 CUE domain titrated with monoubiquitin (A) and K63Ub<sub>2</sub> (B) differ most substantially  
624 from residues 466-474, suggesting that the N-terminal portion of the ASCC2  $\alpha 1$  helix  
625 may participate in binding to K63-linked polyubiquitin chains. An asterisk (\*) indicates  
626 the resonance disappeared during the titration.

627

628

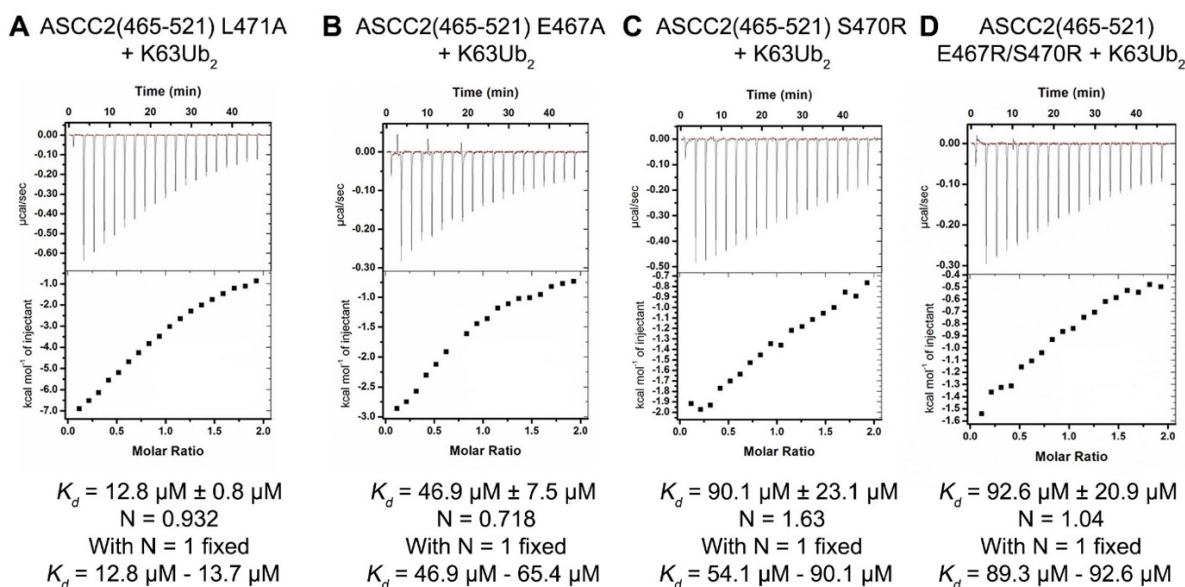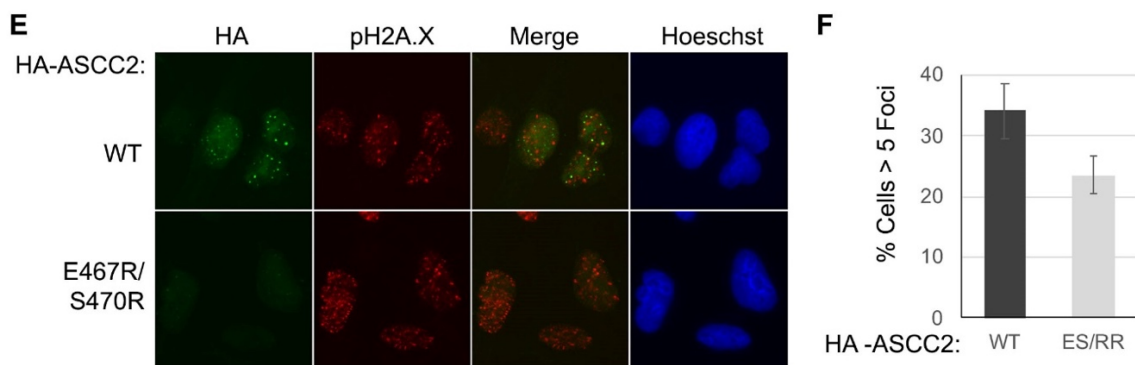

630

631 Figure 6. ASCC2 residues E467 and S470 bind the proximal ubiquitin of K63Ub<sub>2</sub>. (A)  
 632 The ASCC2(465-521) L471A mutant binds K63Ub<sub>2</sub> with nearly the same affinity as wild-  
 633 type ASCC2(465-521) (Figure 4A). (B) The ASCC2(465-521) E467A mutant, however,  
 634 binds K63Ub<sub>2</sub> approximately 3.6 – 5.0-fold more weakly than wild-type ASCC2(465-  
 635 521) and (C) the ASCC2(465-521) S470R mutant and (D) the ASCC2(465-521)  
 636 E467R/S470R double mutant bind approximately 7.0-fold more weakly. These results  
 637 suggest that ASCC2 residues E467 and S470 participate in the binding interaction with  
 638 K63-linked polyubiquitin chains. (E) HA-tagged ASCC2, or the E467R/S470R mutant,  
 639 were expressed in U2OS cells, then treated with 0.5 mM MMS for six hours.  
 640 Immunofluorescence for HA and pH2A.X were performed after extraction with Triton X-  
 641 100, as shown, with Hoechst used as the nuclear counter stain. (F) Quantification of foci  
 642 formation. N = 3 replicates and error bars indicate +/- S.D. of the mean.



643

644

645

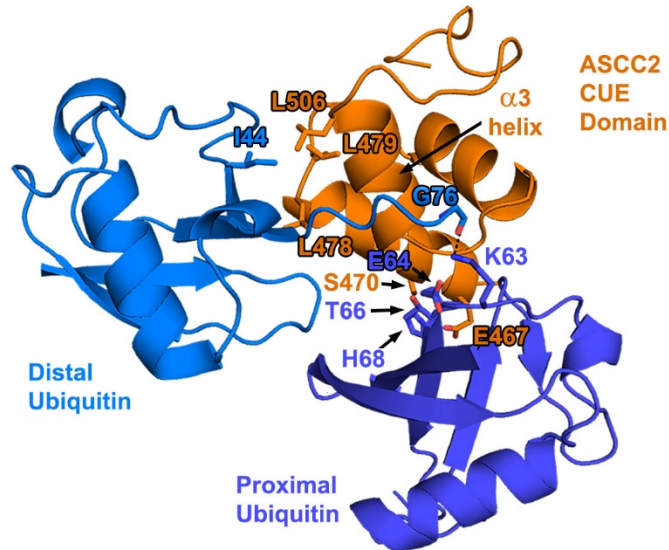

647

648 Figure 7. Model of the ASCC2(465-521):K63Ub<sub>2</sub> complex. The ASCC2 CUE domain  
649 was superimposed onto the gp78 CUE domain structure in the gp78 CUE:ubiquitin  
650 complex (PDB ID: 2LVO). The proximal ubiquitin of K63Ub<sub>2</sub> was docked to the complex  
651 using the HADDOCK server. In this model, binding of the I44 patch of the distal ubiquitin  
652 to the hydrophobic  $\alpha 1$  and  $\alpha 3$  sequence motifs of ASCC2, mediated by residues  
653 including L479 and L506, positions the C-terminal tail of the distal ubiquitin to interact  
654 with the  $\alpha 3$  helix of ASCC2. Isopeptide bond formation at proximal ubiquitin residue K63  
655 (dashed line), places adjacent proximal ubiquitin residues E64 and T66 within binding  
656 distance of the ASCC2 CUE domain. The proximal ubiquitin of K63Ub<sub>2</sub> docks against  
657 the N-terminal end of the CUE domain  $\alpha 1$  helix, where ASCC2 residues E467 and S470  
658 interact with proximal ubiquitin residues.
